# Supplementary material for: Understanding mental health among university students in Kenya: what role do family support and age play?
Source: Front Public Health. 2025 May 30;13:1557058. doi: 10.3389/fpubh.2025.1557058 (PMC12164729; doi:10.3389/fpubh.2025.1557058)
Supplement: Supplementary file 1 [file Supplementary_file_1.xlsx]

## Sheet: Sheet1
Column Name	Description	Data Type	Example of Values
age	Age of the respondent	Numeric	18-42
study	Year of study	Categorical	First Year, Second Year, Third Year, Fourth Year
Agegrps	Age group of the respondent	Categorical	<20 years, 20-24 years, 25-29 years, >30 years
sex	Gender of the respondent	Categorical	Male, Female
marstat	Marital status of the respondent	Categorical	Married, single/widowed/separated
HHead	Whether the respondent is the head of the household	Categorical	Yes, No
Activitylevel	Level of physical activity	Categorical	Rarely, Occasionally, Frequently
SocialMedia	Daily hours spent on social media	Categorical	<1 hour, 1-3 hours, 3-5 hours, >5 hours
InsuranceforMH	Whether the respondent has insurance for mental health	Categorical	Yes, No
Accomodation	Type of accommodation	Categorical	On-Campus Halls, Off-Campus Private Apartments
Live_with_both_parents	Whether the respondent lives with both parents	Categorical	Yes, No
Reason_not_living_with_parents	Reason for not living with parents	Text	Single parent, Studying far from both parents, Death, etc.
Supportive	Level of support from family or friends	Categorical	Not supportive, Slightly supportive, Moderately supportive, Very supportive
Incomesource	Primary source of income	Categorical	Loan, Family, Personal, Scholarship, Other
Difficult	Whether the respondent finds life difficult	Categorical	Yes, No
HowOften	Frequency of experiencing difficulties	Categorical	Rarely, Occasionally, Frequently
Awareness	Awareness of mental health services	Categorical	Yes, No
MHServices	Whether the respondent has used mental health services	Categorical	Yes, No
Symptoms	Presence of mental health symptoms	Categorical	Yes, No
SeekMedicalHelp	Whether the respondent has sought medical help for mental health	Categorical	Yes, No
Nervous	Frequency of feeling nervous	Numeric	0-3 (0 = Not at all, 3 = Nearly every day)
Worrying	Frequency of worrying	Numeric	0-3 (0 = Not at all, 3 = Nearly every day)
Things	Frequency of feeling that things are getting out of control	Numeric	0-3 (0 = Not at all, 3 = Nearly every day)
Trouble	Frequency of trouble relaxing	Numeric	0-3 (0 = Not at all, 3 = Nearly every day)
Restless	Frequency of feeling restless	Numeric	0-3 (0 = Not at all, 3 = Nearly every day)
Irritable	Frequency of feeling irritable	Numeric	0-3 (0 = Not at all, 3 = Nearly every day)
Afraid	Frequency of feeling afraid	Numeric	0-3 (0 = Not at all, 3 = Nearly every day)
GAD7_total_score	Total score from the Generalized Anxiety Disorder-7 (GAD-7) questionnaire	Numeric	0-21
GAD7_severity	Severity of anxiety based on GAD-7 score	Categorical	A_Minimal, A_Mild, A_Moderate, A_Severe
Interest	Frequency of loss of interest in activities	Numeric	0-3 (0 = Not at all, 3 = Nearly every day)
Hopeless	Frequency of feeling hopeless	Numeric	0-3 (0 = Not at all, 3 = Nearly every day)
Sleeping	Frequency of trouble sleeping	Numeric	0-3 (0 = Not at all, 3 = Nearly every day)
Tired	Frequency of feeling tired	Numeric	0-3 (0 = Not at all, 3 = Nearly every day)
Appetite	Frequency of changes in appetite	Numeric	0-3 (0 = Not at all, 3 = Nearly every day)
Family	Frequency of feeling bad about oneself due to family issues	Numeric	0-3 (0 = Not at all, 3 = Nearly every day)
Concentrating	Frequency of trouble concentrating	Numeric	0-3 (0 = Not at all, 3 = Nearly every day)
Moving	Frequency of moving or speaking slowly	Numeric	0-3 (0 = Not at all, 3 = Nearly every day)
Thoughts	Frequency of thoughts of self-harm	Numeric	0-3 (0 = Not at all, 3 = Nearly every day)
PHQ9_total_score	Total score from the Patient Health Questionnaire-9 (PHQ-9)	Numeric	0-27
PHQ9_severity	Severity of depression based on PHQ-9 score	Categorical	D_Minimal, D_Mild, D_Moderate, D_Moderately Severe, D_Severe
Hypomania	Presence of hypomania symptoms	Categorical	Yes, No
Hypomania2	Additional hypomania symptoms	Categorical	Yes, No
Thoughtinsertion	Presence of thought insertion symptoms	Categorical	Yes, No
Thoughtinsertion2	Additional thought insertion symptoms	Categorical	Yes, No
Paranoia	Presence of paranoia symptoms	Categorical	Yes, No
Paranoia2	Additional paranoia symptoms	Categorical	Yes, No
Strangeexperiences	Presence of strange experiences	Categorical	Yes, No
Strangeexperiences2	Additional strange experiences	Categorical	Yes, No
Hallucinations	Presence of hallucinations	Categorical	Yes, No
Hallucinations2	Additional hallucinations	Categorical	Yes, No
Hypomaniasymp	Hypomania symptoms	Numeric	0-2
Insertion	Thought insertion symptoms	Numeric	0-2
Paranoiasymp	Paranoia symptoms	Numeric	0-2
Strange	Strange experiences	Numeric	0-2
Hallucinationsymp	Hallucination symptoms	Numeric	0-2
Psychosis	Presence of psychosis	Categorical	Yes, No
Psychosis_numeric	Numeric representation of psychosis	Numeric	0-1
Anxiety	Presence of anxiety	Categorical	Yes, No
Depression	Presence of depression	Categorical	Yes, No
MH_condition	Presence of any mental health condition	Categorical	Yes, No
Both_Depression_Anxiety	Presence of both depression and anxiety	Categorical	Yes, No
All_Three_Conditions	Presence of depression, anxiety, and psychosis	Categorical	Yes, No
Awareness_numeric	Numeric representation of awareness	Numeric	0-1
